# Supplementary material for: Metal-to-metal communication during the spin state transition of a [2 × 2] Fe(ii) metallogrid at equilibrium and out-of-equilibrium conditions
Source: Royal Society of Chemistry journal article supplement (doi:10.1039/d1dt04255f), 2022-01-01
Supplement: d1dt04255f1.pdf [file d1dt04255f1.pdf]

# Metal-to-metal communication during the spin state transition of a [2x2] Fe(II) metallogrid at equilibrium and out-of-equilibrium conditions

Jose de Jesus Velazquez-Garcia<sup>a\*</sup>, Krishnayan Basuroy<sup>a</sup>, Darina Storozhuk<sup>a</sup>, Joanne Wong<sup>b</sup>, Serhiy Demeshko<sup>b</sup>, Franc Meyer<sup>b</sup>, Robert Henning<sup>c</sup> and Simone Techert<sup>a,d</sup>

<sup>a</sup>Photon Science - Structural Dynamics in Chemical Systems, Deutsches Elektronen-Synchrotron DESY, Notkestraße 85, Hamburg, 22607, Germany

<sup>b</sup>Institut für Anorganische Chemie, Georg-August-Universität Göttingen, Tammannstraße 4, Göttingen, 37077, Germany

<sup>c</sup>Center for Advanced Radiation Sources, The University of Chicago, Argonne National Laboratory, 9700 South Cass Ave, Lemont, Illinois, 90439, USA

<sup>d</sup>Institut für Röntgenphysik, Georg-August-Universität Göttingen, Friedrich-Hund-Platz 1, Göttingen, 37077, Germany

## Synthesis

The complex grid **FE4** and its ligand were synthesized following the procedure reported in literature<sup>1</sup>. The crystallographic data for this paper can be obtained free of charge from The Cambridge Crystallographic Data Centre via [www.ccdc.cam.ac.uk/data\\_request/cif](http://www.ccdc.cam.ac.uk/data_request/cif). Deposition numbers:

**FE4** from 100 K to 390 K: 2126240, 2127042-2127051, 2127052-2127057 and 2127059-2127064.

Time resolved: 2127311-2127319.

## Vibrational spectroscopy

The infrared spectra in the 2000-2500  $\text{cm}^{-1}$  range of the original and desolvated **FE4** grid are shown in Figure S6. The presence of acetonitrile in the original **FE4** sample is confirmed by the appearance of two distinctive signals:  $\nu(\text{C}\equiv\text{N})$  at 2249  $\text{cm}^{-1}$  and a combined band of  $\nu(\text{C}-\text{C})+\delta(\text{CH}_3)$  at 2293  $\text{cm}^{-1}$ <sup>2-5</sup>. In contrast, the desolvated **FE4** grid did not display the aforementioned bands, which indicate a complete desolvation.

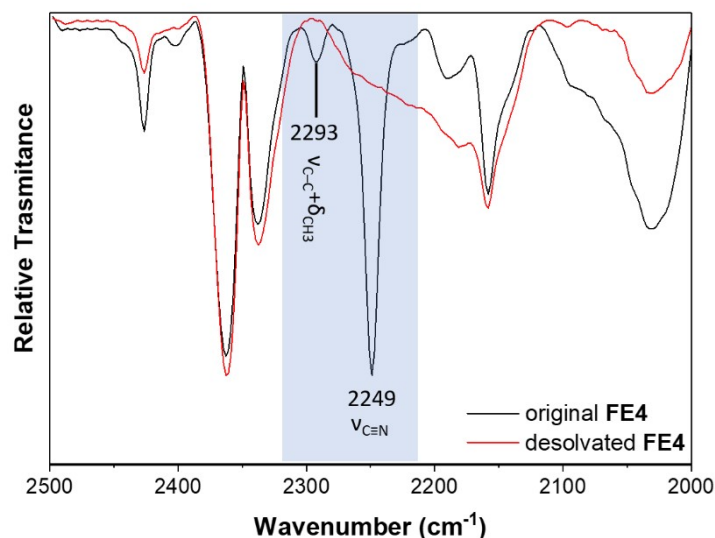

Figure S1. FTIR spectra for original and desolvated **FE4** grid.

## Characterization

Table S1. Crystal data and structure refinement parameters of **FE4** at 100 K.

|                                                |                                    |
|------------------------------------------------|------------------------------------|
| Temperature                                    | 100 K                              |
| Empirical Formula                              | C100 H74 B4 F16 Fe4 N26            |
| Crystal color/habit                            | Black/block                        |
| Crystal size (mm)                              | (0.090x0.120x0.050)                |
| Crystallizing solvent                          | Acetonitrile                       |
| Crystal system/ Space group                    | Monoclinic/ C2/c                   |
| <i>a</i> (Å)                                   | 30.680 (6)                         |
| <i>b</i> (Å)                                   | 12.780 (3)                         |
| <i>c</i> (Å)                                   | 26.810 (5)                         |
| $\alpha$ (°)                                   | 90                                 |
| $\beta$ (°)                                    | 120.76 (3)                         |
| $\gamma$ (°)                                   | 90                                 |
| Volume (Å <sup>3</sup> )                       | 9107.0 (4)                         |
| Z/Z'                                           | 4/0.5                              |
| Molecular Weight                               | 2210.49                            |
| Calculated density (g/cm <sup>3</sup> )        | 1.625                              |
| F(000)                                         | 4496                               |
| Radiation                                      | Synchrotron ( $\lambda=0.61990$ Å) |
| $\theta$ range (°)                             | 1.902/31.355                       |
| Scan type                                      | $\varphi$                          |
| Measured reflections                           | 48052                              |
| Unique reflections                             | 14709                              |
| Observed reflections                           | 13786                              |
| [ F  > 4 $\sigma$ (F)]                         |                                    |
| Final R (%)                                    | 5.03                               |
| wR2 (%)                                        | 14.88                              |
| Good-of-fit on F <sup>2</sup> (S)              | 1.086                              |
| $\Delta\rho$ max (e. Å <sup>-3</sup> )         | 0.794                              |
| $\Delta\rho$ min (e. Å <sup>-3</sup> )         | -0.696                             |
| No of restraints/parameters                    | 90/751                             |
| Data [ F  > 4 $\sigma$ (F)]-to-parameter ratio | 18.35:1                            |

Table S2. Selected bond lengths and bond angles for compound **FE4** at 100K.

| Bond lengths (Å) |            | Bond angles (°) |           |               |           |
|------------------|------------|-----------------|-----------|---------------|-----------|
| Fe(A)-N2         | 1.9030(12) | N2-Fe(A)-N5     | 172.81(5) | N7-Fe(B)-N10  | 100.60(5) |
| Fe(A)-N5         | 1.9036(12) | N2-Fe(A)-N00    | 80.53(6)  | N7-Fe(B)-N11  | 129.94(5) |
| Fe(A)-N00        | 1.9893(14) | N5-Fe(A)-N00    | 95.49(6)  | N10-Fe(B)-N11 | 76.23(5)  |
| Fe(A)-N3         | 1.9898(13) | N2-Fe(A)-N3     | 80.08(6)  | N7-Fe(B)-N8   | 76.59(6)  |
| Fe(A)-N4         | 1.9949(12) | N5-Fe(A)-N3     | 103.96(6) | N10-Fe(B)-N8  | 128.36(5) |
| Fe(A)-N6         | 1.9953(11) | N00-Fe(A)-N3    | 160.55(5) | N11-Fe(B)-N8  | 143.82(6) |
| Fe(B)-N7         | 2.1203(14) | N2-Fe(A)-N4     | 94.07(5)  | N7-Fe(B)-N12  | 90.50(5)  |
| Fe(B)-N10        | 2.1327(13) | N5-Fe(A)-N4     | 80.37(5)  | N10-Fe(B)-N12 | 146.11(5) |
| Fe(B)-N11        | 2.1331(13) | N00-Fe(A)-N4    | 96.60(5)  | N11-Fe(B)-N12 | 72.20(5)  |
| Fe(B)-N8         | 2.1413(13) | N3-Fe(A)-N4     | 86.31(5)  | N8-Fe(B)-N12  | 85.27(5)  |
| Fe(B)-N12        | 2.2799(14) | N2-Fe(A)-N6     | 105.09(5) | N7-Fe(B)-N9   | 147.01(5) |
| Fe(B)-N9         | 2.3278(17) | N5-Fe(A)-N6     | 80.30(5)  | N10-Fe(B)-N9  | 92.69(6)  |
|                  |            | N00-Fe(A)-N6    | 84.10(5)  | N11-Fe(B)-N9  | 82.44(5)  |
|                  |            | N3-Fe(A)-N6     | 99.48(5)  | N8-Fe(B)-N9   | 71.53(6)  |
|                  |            | N4-Fe(A)-N6     | 160.64(5) | N12-Fe(B)-N9  | 95.07(6)  |

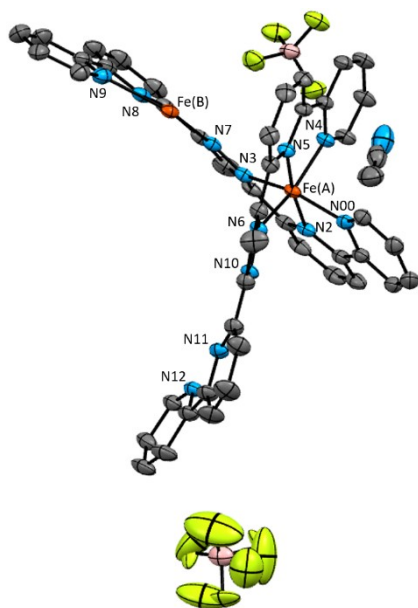

Figure S2. Asymmetric unit of the **FE4** grid at 100K. Hydrogen were omitted for clarity.

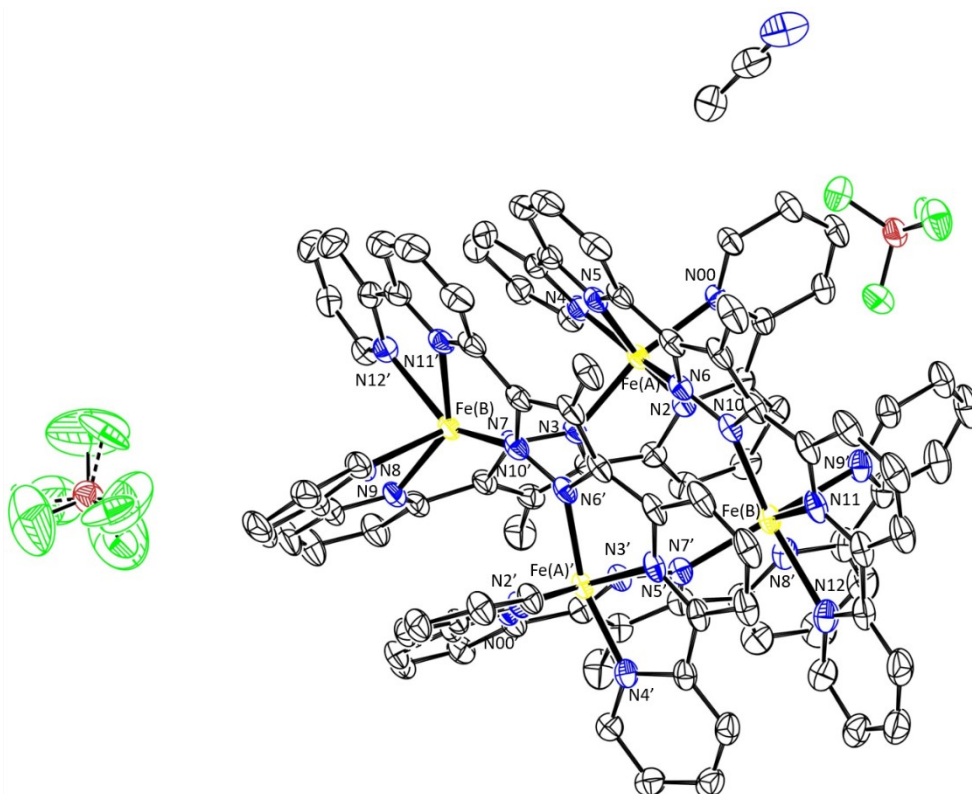

Figure S3. Thermal ellipsoid plot (50% of probability) for **FE4** at 100K.

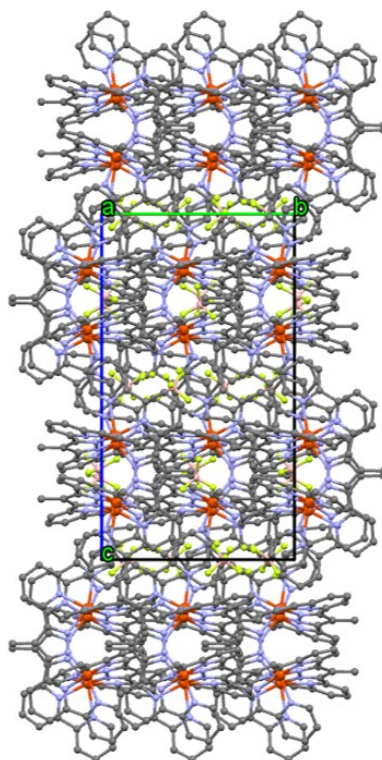

Figure S4. Packing of molecules down crystallographic '*a*' axis. Hydrogen atoms are omitted for clarity.

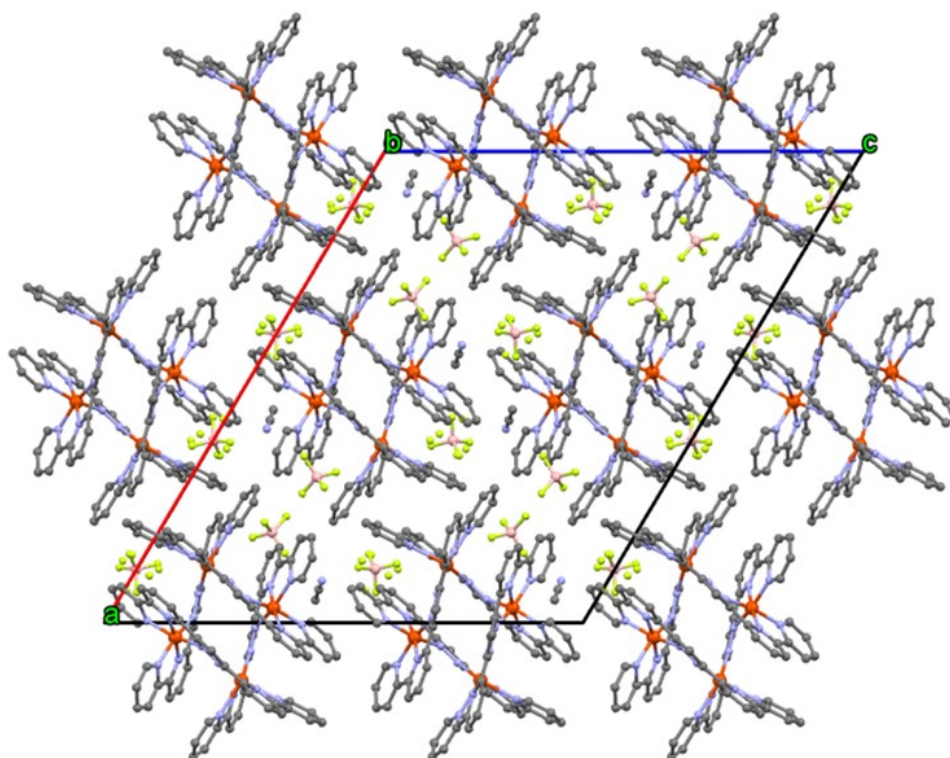

Figure S5. Packing of molecules down crystallographic '*b*' axis. Hydrogen atoms are omitted for clarity.

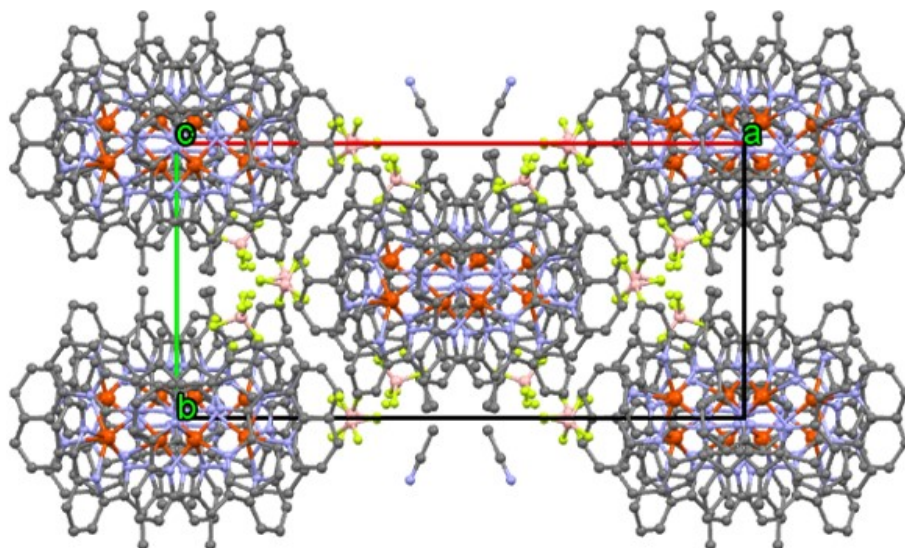

Figure S6. Packing of molecules down crystallographic 'c' axis. Hydrogen atoms are omitted for clarity.

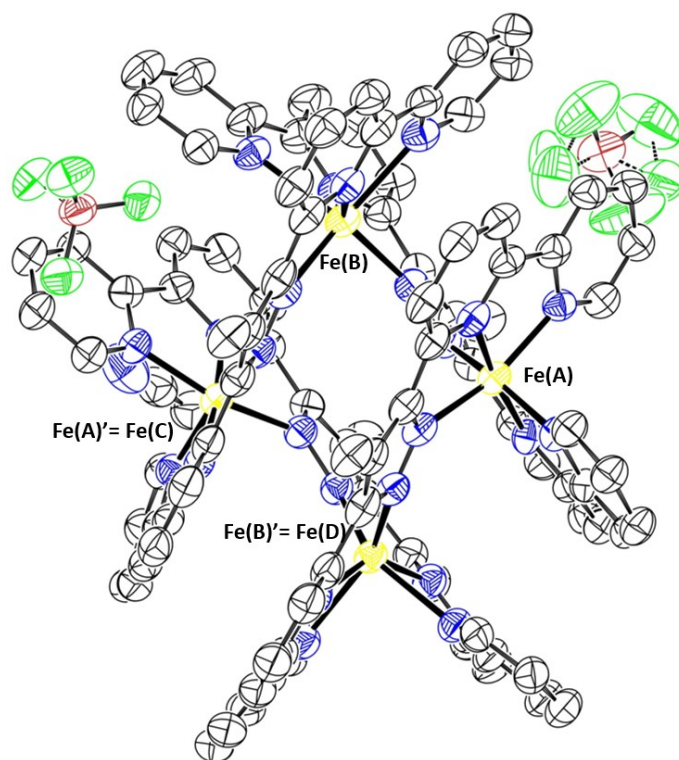

Figure S7. Thermal ellipsoid plot (50% of probability) for **FE4** for the -5ns data.

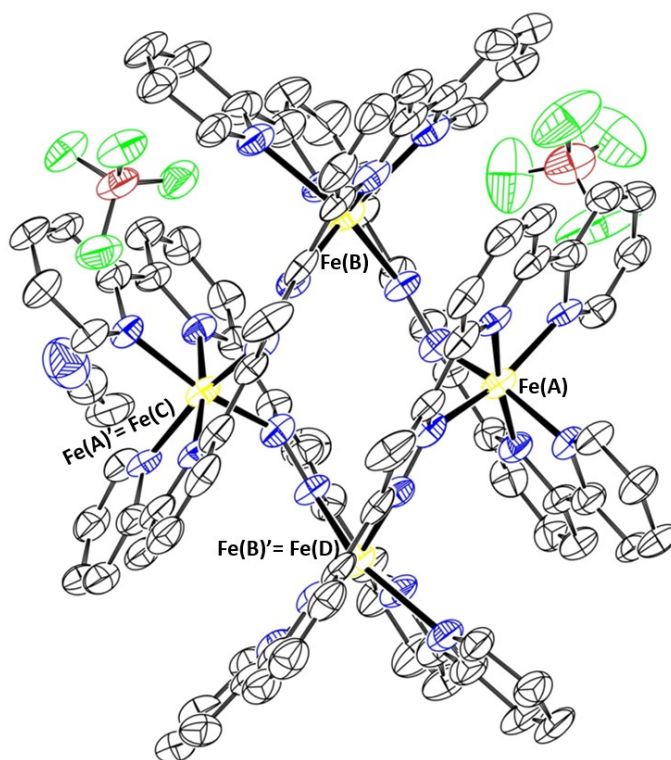

Figure S8. Thermal ellipsoid plot (50% of probability) for **FE4** for the -2ns data.

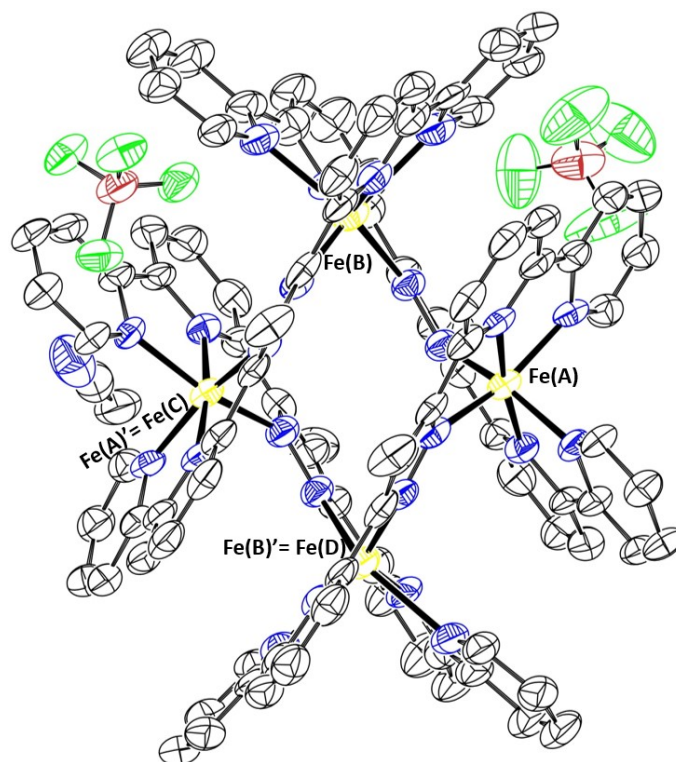

Figure S9. Thermal ellipsoid plot (50% of probability) for **FE4** for the -200ps data.

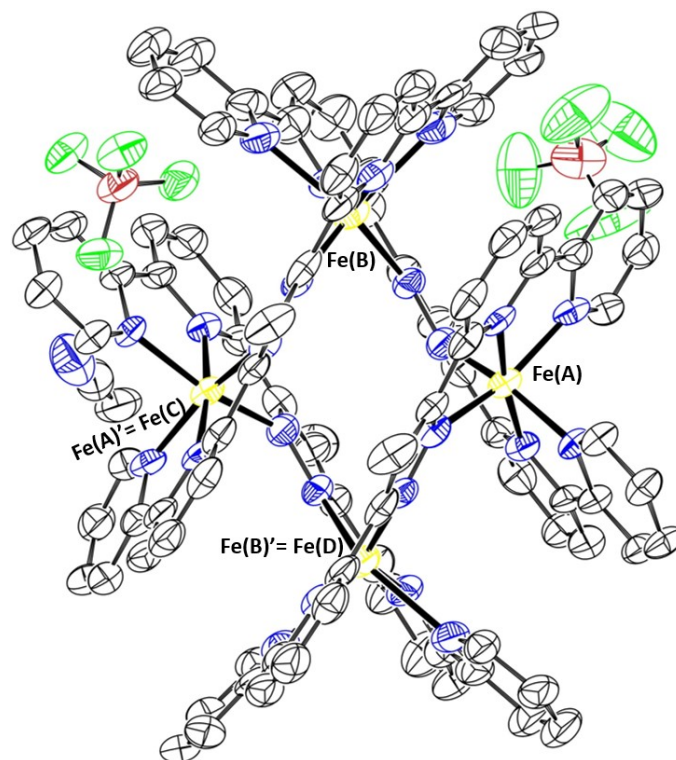

Figure S10. Thermal ellipsoid plot (50% of probability) for **FE4** for the 100ps data.

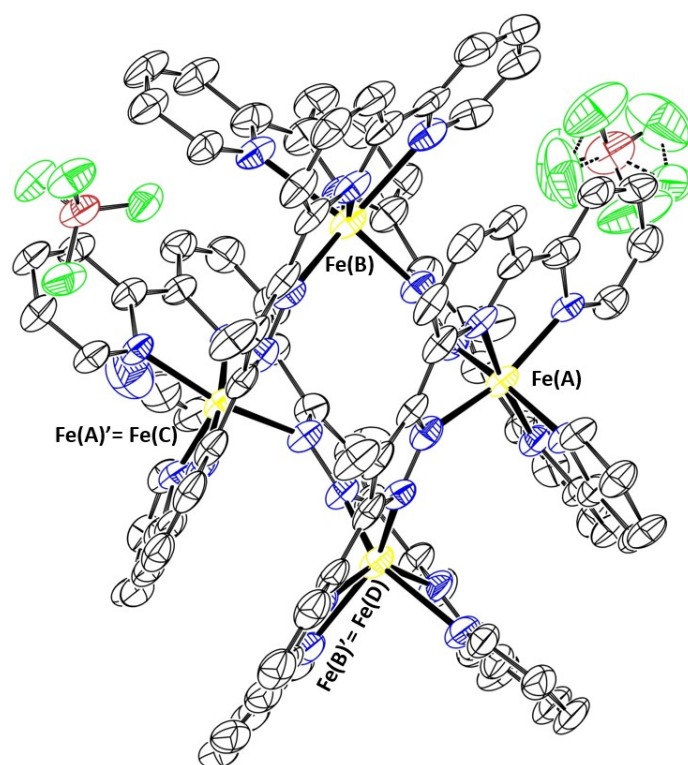

Figure S11. Thermal ellipsoid plot (50% of probability) for **FE4** for the 200ps data.

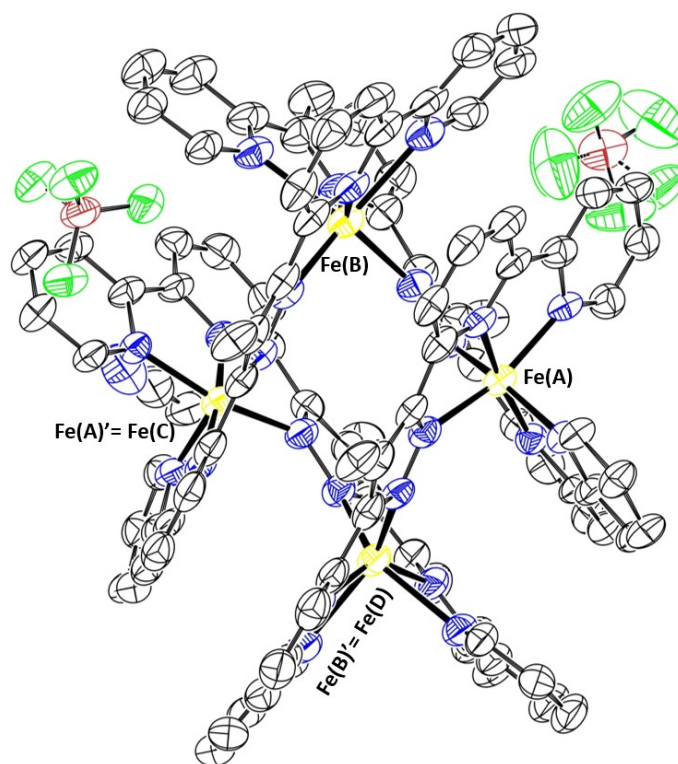

Figure S12. Thermal ellipsoid plot (50% of probability) for **FE4** for the 500ps data.



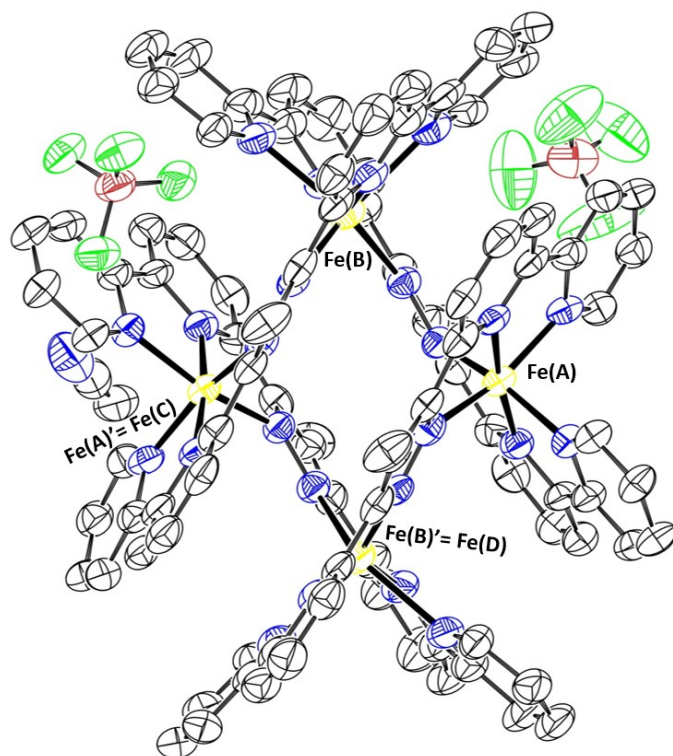

Figure S13. Thermal ellipsoid plot (50% of probability) for **FE4** for the 1ns data.

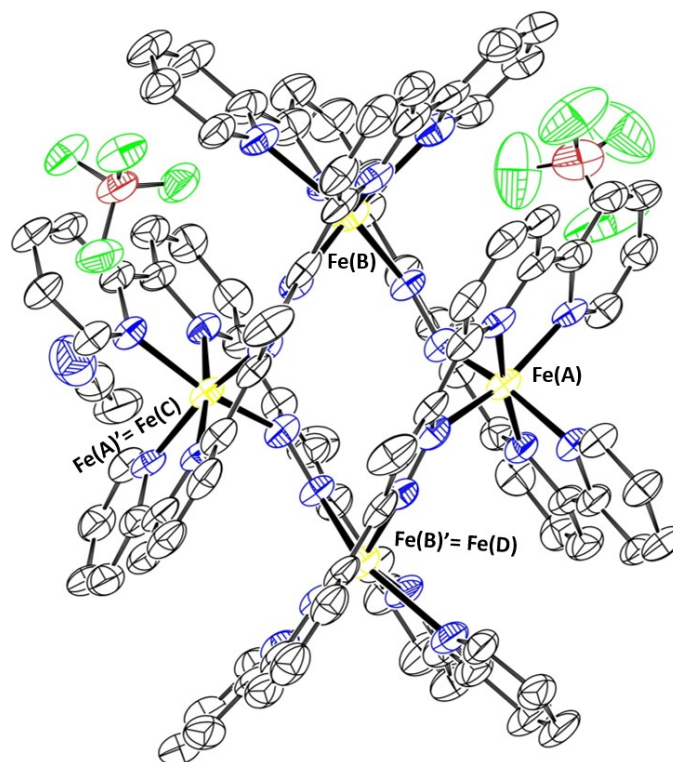

Figure S14. Thermal ellipsoid plot (50% of probability) for **FE4** for the 2ns data.

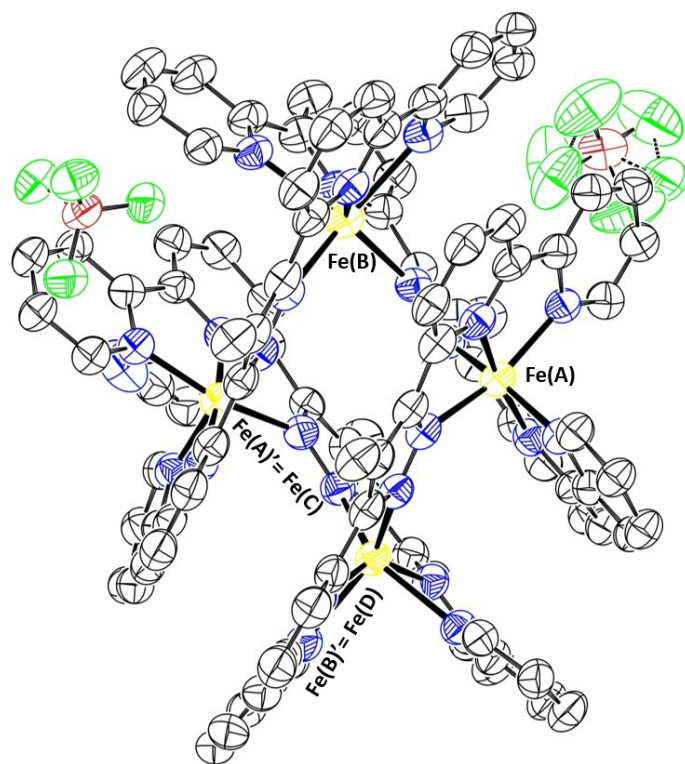

Figure S15. Thermal ellipsoid plot (50% of probability) for **FE4** for the 5ns data.

## Structural details

Table S3. Structural data that provides a basic description of the SCO in **FE4**

| Structural parameter                        | 100 K                                                                               | 290 K                                                                                | 390 K                                                                                 |
|---------------------------------------------|-------------------------------------------------------------------------------------|--------------------------------------------------------------------------------------|---------------------------------------------------------------------------------------|
| <i>Fe(A)-N6 polyhedron</i>                  |                                                                                     |                                                                                      |                                                                                       |
| <Fe1-N> (Å)                                 | 1.96 (2)                                                                            | 1.97 (2)                                                                             | 2.02 (2)                                                                              |
| S(Oh)                                       | 2.315                                                                               | 2.390                                                                                | 3.098                                                                                 |
| S(itp)                                      | 10.529                                                                              | 10.386                                                                               | 9.421                                                                                 |
| $\Sigma$ (°)                                | 103.01 (8)                                                                          | 102.66 (13)                                                                          | 113.40 (13)                                                                           |
| $\Theta$ (°)                                | 306.7425                                                                            | 311.7653                                                                             | 368.8379                                                                              |
| $\zeta$ (Å)                                 | 0.24 (5)                                                                            | 0.25 (5)                                                                             | 0.25 (6)                                                                              |
| Vp (Å <sup>3</sup> )                        | 9.68                                                                                | 9.834                                                                                | 10.426                                                                                |
| <i>Fe(B)-N6 polyhedron</i>                  |                                                                                     |                                                                                      |                                                                                       |
| <Fe2-N> (Å)                                 | 2.19 (4)                                                                            | 2.20 (4)                                                                             | 2.20 (4)                                                                              |
| S(Oh)                                       | 8.401                                                                               | 8.444                                                                                | 8.902                                                                                 |
| S(itp)                                      | 4.417                                                                               | 4.408                                                                                | 4.290                                                                                 |
| $\Sigma$ (°)                                | 172.95 (8)                                                                          | 172.88                                                                               | 177.64 (12)                                                                           |
| $\Theta$ (°)                                | 708.9869                                                                            | 709.6041                                                                             | 734.0074                                                                              |
| $\zeta$ (Å)                                 | 0.46 (9)                                                                            | 0.48 (9)                                                                             | 0.47 (9)                                                                              |
| Vp (Å <sup>3</sup> )                        | 11.835                                                                              | 11.931                                                                               | 11.919                                                                                |
| <i>Molecular Scale</i>                      |                                                                                     |                                                                                      |                                                                                       |
| Superposition of structures                 | 100K (blue) & 290 K (red)                                                           | 100K (blue) & 390 K (red)                                                            |                                                                                       |
|                                             | 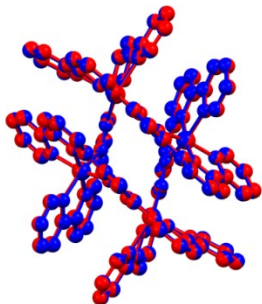  |  |                                                                                       |
| Maximum RMSD                                | 0.1124                                                                              | 0.2356                                                                               |                                                                                       |
| Average RMSD                                | 0.0465                                                                              | 0.1206                                                                               |                                                                                       |
| <i>Unit cell Changes</i>                    |                                                                                     |                                                                                      |                                                                                       |
| <i>a</i> (Å)                                | 31.330 (6)                                                                          | 31.100 (6)                                                                           | 31.330 (6)                                                                            |
| <i>b</i> (Å)                                | 12.780 (3)                                                                          | 12.870 (3)                                                                           | 12.960 (3)                                                                            |
| <i>c</i> (Å)                                | 26.810 (6)                                                                          | 27.360 (6)                                                                           | 27.500 (6)                                                                            |
| V (Å <sup>3</sup> )                         | 9033 (4)                                                                            | 9377 (4)                                                                             | 9551 (4)                                                                              |
| <i>Crystal packing</i>                      |                                                                                     |                                                                                      |                                                                                       |
| Intermolecular interactions                 |  |  |  |
| Separation between $\pi$ - $\pi$ planes (Å) | 3.444, 4.503                                                                        | 3.509, 4.665                                                                         | 3.565, 4.769                                                                          |
| Crystal density                             | 1.571                                                                               | 1.513                                                                                | 1.486                                                                                 |

$\Sigma = \sum_{i=1}^{12} |90 - \phi_i|$ , the sum of the angular deviations from 90° for the 12 cis angles ( $\phi_i$ )<sup>6,7</sup>,  $\Theta = \sum_{i=1}^{24} |60 - \theta_i|$ <sup>8</sup>,  $\zeta = (\text{Fe-N}_i) - \langle \text{Fe-N} \rangle$ <sup>9</sup>. Information about S(Oh) and S(itp) is provided in the structural analysis section.

## Structural Analysis

The Octadist program<sup>10</sup> was used to determine the <Fe-N> bond length and the angular distortion parameter that describe the octahedral coordination environment of the metal centres in the **FE4** grid. The angular distortion parameter,  $\Theta$ , is the sum of the deviations from 60° of the twenty-four N-Fe-N angles, six per pseudo three-fold axis, measured on a projection of opposite triangular faces of the {FeN<sub>6</sub>} octahedron, orientated by superimposing the face centroids (Figure S16).<sup>8,11</sup>

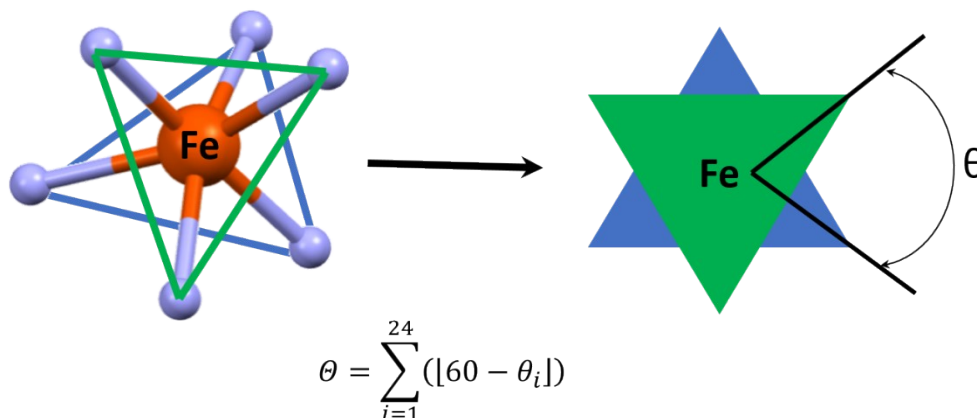

Figure S16. Environment of Fe<sup>II</sup> ions and definition of the  $\theta$  angle and the angular distortion parameter ( $\Theta$ ).<sup>8,11</sup>

For comparison, continuous shape measurements (CShM) were also used to characterise the relative deviation of the metal coordination spheres in **FE4** from ideal polyhedra described by a particular point symmetry group (Table S2).<sup>12</sup> Mathematically, CShM of the coordination polyhedron Q with the geometric centre  $\vec{q}_0$  relative to an ideal polyhedron P is expressed as:

$$S_Q = \min \left[ \frac{\sum_{i=1}^N |\vec{q}_i - \vec{p}_i|^2}{\sum_{i=1}^N |\vec{q}_i - \vec{q}_0|^2} \right] \times 100 \quad (\text{S1})$$

where  $\vec{q}_i$  and  $\vec{p}_i$  are the position vectors for atoms of two polyhedral. CShM relative to an ideal octahedron (S(Oh)) and an ideal trigonal prism (S(itp)) were calculated using the SHAPE program<sup>13</sup>. The calculation of S(Oh) and S(itp) were performed for all crystallographic-symmetry independent metal atoms.

It is well-known that the {FeN<sub>6</sub>} coordination sphere of LS Fe<sup>II</sup> ions is more regular, i.e., closer to an ideal octahedron. Therefore, the S(Oh) parameter is small and closer to 0, while the parameter S(itp) >> 0. Contrary, Fe<sup>II</sup> ions in the HS state are characterised by a more irregular structure with structural parameters S(Oh) >> 0 and S(itp) closer to zero.



## Temperature difference

The well-known Wilson plot<sup>14</sup> is frequently used to estimate the scale factor,  $k_s$ , and the overall isotropic temperature factor (B) of a data set. This plot can be obtained by statistical comparison of the observed

intensities ( $I_{obs}$ ) with the average squared structure factor equals  $\sum_{i=1}^M f_i^2$  for each  $\sin \theta/\lambda$  range according to:

$$\ln \left( \frac{I_{obs}}{\sum_{i=1}^M f_i^2} \right) = \ln(k_s) - 2B(\sin \theta/\lambda)^2 \quad (S2)$$

Where M is the number of atoms and  $f_i$  is the scattering factor of the  $i$ th atom.

The change in the overall isotropic temperature factor ( $\Delta B$ ) between two data sets at different temperature can be estimated from modified Wilson plots. The plots are obtained by a scale-factor refinement of the low temperature data (e.g. 100K) with the high-temperature data (e.g. 290K) structural model and plotting the  $\ln(I^{100K}/I^{290K})$ . The slope of the dependence of  $\ln(I^{100K}/I^{290K})$  with  $(\sin \theta/\lambda)^2$  gives the overall increase of isotropic atomic motion,  $\Delta B$  (equation S3), which is associated with temperature difference between the data sets.<sup>15</sup>

$$\ln \left( \frac{I^{100K}}{I^{290K}} \right) = -2\Delta B^{100K-290K}(\sin \theta/\lambda)^2 \quad (S3)$$

The greater the temperature difference between data sets the greater the value of  $\Delta B$ , that means a more negative slope of the plot. This feature is used to analyse the temperature increase during the photo-crystallographic experiments as explain below.

During the photo-crystallographic experiments, the energy deposited by the laser pulse largely exceed the energy necessary for the LS to HS transition, which results in some heat diffusion and global warming. A modified Wilson plot, known as photo-Wilson plot (Fig. S17), is then used to estimate the lase-induced temperature increase due to heat dissipation, in a similar way as described above for the temperature-Wilson plots. From the photo-Wilson plot is possible to calculate the variation of the isotropic temperature factor between the data sets at time “t” and the reference data at time  $t < 0$  ( $\Delta B^{t-t < 0}$ )<sup>15</sup>:

$$\ln \left( \frac{I^{dt}}{I^{dt < 0}} \right) = -2\Delta B^{dt-dt < 0}(\sin \theta/\lambda)^2 \quad (S4)$$

where,  $I^{dt}$  and  $I^{dt < 0}$  are the observed intensities of data sets at delay time “dt” and the reference data at delay time  $dt < 0$ . Note that both the thermal-Wilson plot and the photo-Wilson plot were brought to the same scale before calculating the value of  $\Delta B$ . For more information about this topic, the reader is referred to the literature<sup>15</sup>.

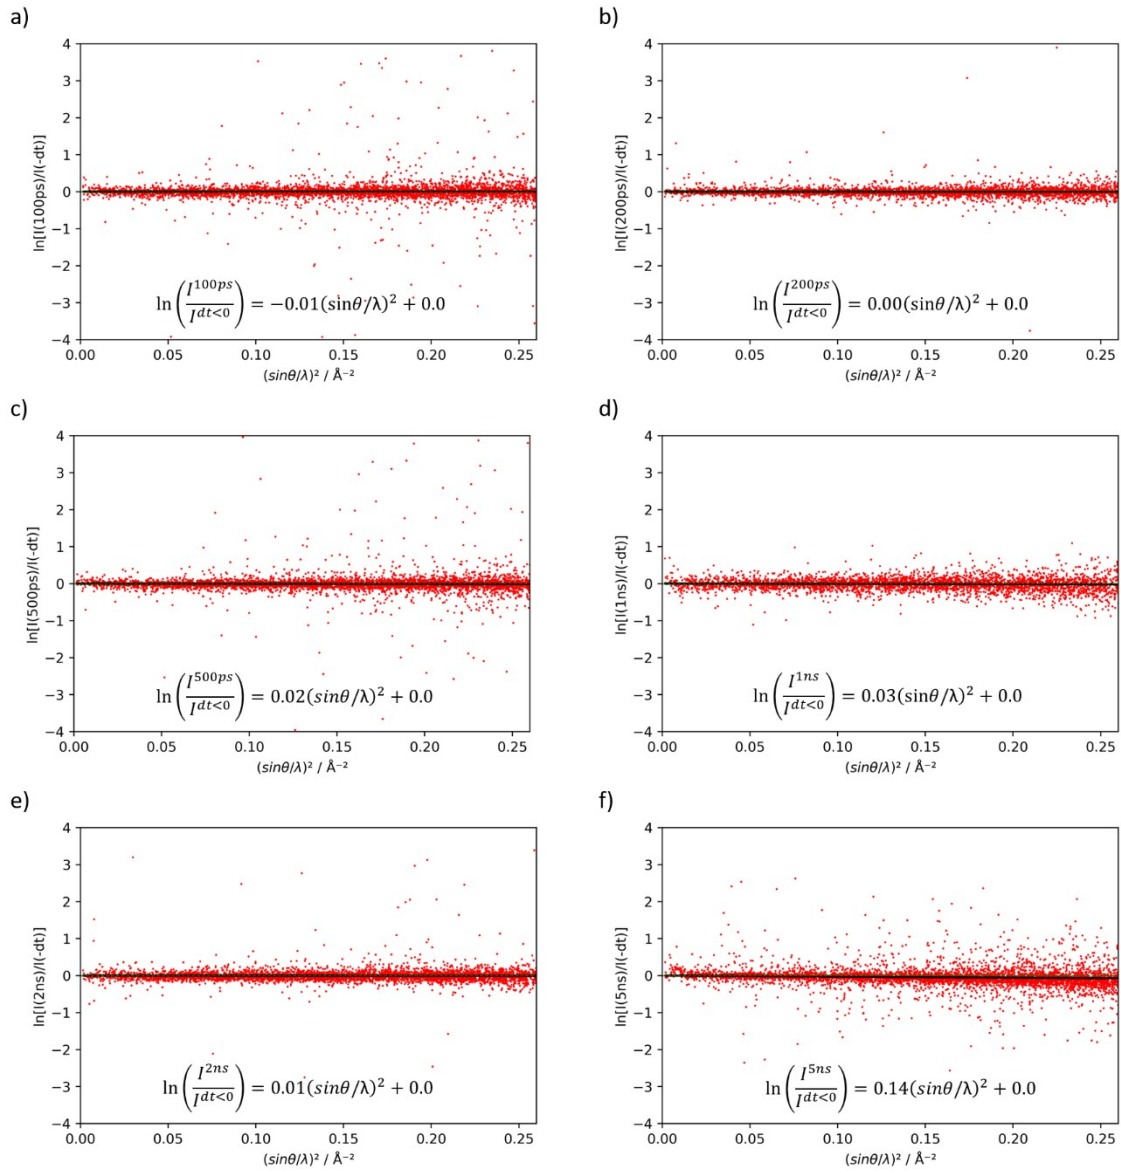

Figure S17. PhotoWilson plots of **FE4**

## References

- 1 B. Schneider, S. Demeshko, S. Neudeck, S. Dechert and F. Meyer, *Inorg. Chem.*, 2013, **52**, 13230–13237.
- 2 G. Busca, T. Montanari, M. Bevilacqua and E. Finocchio, *Colloids Surf. Physicochem. Eng. Asp.*, 2008, **320**, 205–212.
- 3 M. P. Marzocchi and S. Dobos, *Spectrochim. Acta Part Mol. Spectrosc.*, 1974, **30**, 1437–1444.
- 4 N. S. Marinković, M. Hecht, J. S. Loring and W. R. Fawcett, *Electrochimica Acta*, 1996, **41**, 641–651.
- 5 P. Schäringer, T. E. Müller, A. Jentys and J. A. Lercher, *J. Catal.*, 2009, **263**, 34–41.
- 6 P. Guionneau, M. Marchivie, G. Bravic, J.-F. Létard and D. Chasseau, in *Spin Crossover in Transition Metal Compounds II*, eds. P. Gütllich and H. A. Goodwin, Springer Berlin Heidelberg, Berlin, Heidelberg, 2004, pp. 97–128.
- 7 M. A. Halcrow, *Chem. Soc. Rev.*, 2011, **40**, 4119.
- 8 M. Marchivie, P. Guionneau, J.-F. Létard and D. Chasseau, *Acta Crystallogr. B*, 2005, **61**, 25–28.
- 9 M. Buron-Le Cointe, J. Hébert, C. Baldé, N. Moisan, L. Toupet, P. Guionneau, J. F. Létard, E. Freysz, H. Cailleau and E. Collet, *Phys. Rev. B*, , DOI:10.1103/PhysRevB.85.064114.
- 10 R. Ketkaew, Y. Tantirungrotechai, P. Harding, G. Chastanet, P. Guionneau, M. Marchivie and D. J. Harding, *Dalton Trans*, 2021, **50**, 1086–1096.
- 11 M. Marchivie, P. Guionneau, J.-F. Létard and D. Chasseau, *Acta Crystallogr. B*, 2003, **59**, 479–486.
- 12 H. Zabrodsky, S. Peleg and D. Avnir, *J. Am. Chem. Soc.*, 1992, **114**, 7843–7851.
- 13 M. Llunell, D. Casanova, J. Cirera, P. Alemany and S. Alvarez, *SHAPE program, version 2.1*, Barcelona, 2003.
- 14 A. J. C. WILSON, *Nature*, 1942, **150**, 152–152.
- 15 M. S. Schmökel, R. Kamiński, J. B. Benedict and P. Coppens, *Acta Crystallogr. A*, 2010, **66**, 632–636.
